# Supplementary material for: Pt nanoparticles breathe and reversibly detach from Al2O3 in hydrogen
Source: Research Square preprint supplement (doi:10.21203/rs.3.rs-5912049/v1), 2025-02-04
Supplement: Supplementary file 1 [file d277c47e565e33784a269cb5.docx]

**SUPPORTING INFORMATION**

**Pt nanoparticles breathe and reversibly detach from Al2O3 in hydrogen**

Daniele Bonavia, Alberto Ricchebuono, Paolo Lazzarini, Eleonora Vottero, Riccardo Pellegrini, Andrea Piovano, Celine Chizallet, Pascal Raybaud, Catherine Dejoie, Ivo Alxneit, Stefano Checchia, Davide Ferri, Elena Groppo

1. Description of the cell used for in situ XRD and PDF measurements

2. High-resolution XRD of the Al2O3 support

3. Construction and optimization of the Pt34/γ-Al2O3 and Pt55/γ-Al2O3 models

4. Determination of the average Pt crystal size from PDF data

5. Monitoring the reduction process: additional plots

6. Comparison of the PDF patterns at the end of the reduction process in gas and liquid phase for both catalysts

7. Simulated PDF patterns for PtxHy/Al2O3 models in the two extreme hydrogenation states

**1. Description of the cell used for in situ XRD and PDF measurements**

The flow-through cell used in this work consists of a stainless-steel body coupled to two symmetric end plates (Figure S1). The central body hosts a 9 mm3 sample compartment, where the catalyst powder is loaded between two quartz wool plugs; two 45 W heating resistors; and a thermocouple placed in contact with the sample compartment. The sample is sandwiched between two fluorinated rubber gaskets (Grenoble-Alpes Elastomers, France) and two glassy carbon windows (HTW, Germany). The cell can heat the sample up to 180°C while allowing leak-free flow of either liquid or gaseous feeds. The exit window allows a maximum 2θ angle of 60° between the centre of the sample volume and the steel rim of the window.

**Figure S1.** Exploded schematic of the flow-through cell employed for in situ XRD and PDF measurements, either in gas or liquid phase.


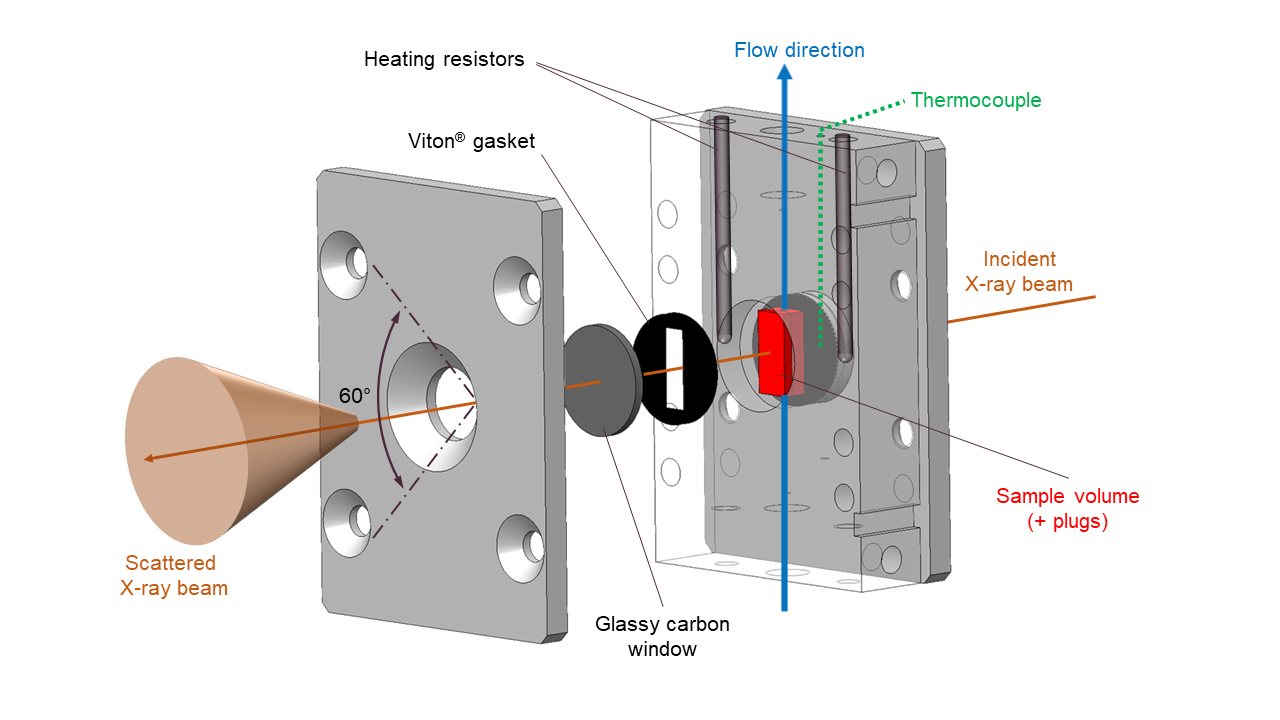


**2. High-resolution XRD of the Al2O3 support**

High-resolution powder-diffraction was collected at the ID22 beamline of the ESRF using the 13-crystal multianalyzer stage.1 Samples were the Pt/Al2O3 sample studied in this work and four bare Al2O3 samples (Figure S2), all supplied by Chimet S.p.A. (Viciomaggio, Italy). The bare Al2O3 samples were the mixed-phase alumina used in Pt/Al2O3, and three samples containing predominantly θ, δ, or γ phases, respectively.

Fits were carried out in Topas v7.2 The alumina phase was refined in a Le Bail-type fit using as initial model the phase δ1(s.g. *P*212121) reported by Kovarik et al.3 The *fcc* Pt phase was refined simultaneously varying lattice parameter, Pseudo-Voigt peak width, scale factor, and a Debye-Waller factor. Intrinsic line broadening due to instrumentation was first modelled on the pattern of a NIST standard powder (Cr2O3 SRM-674b), collected in the same setup, and then deconvoluted during these fits. Crystallite sizes were calculated from the peak integral breadth using the Double-Voigt approach.4


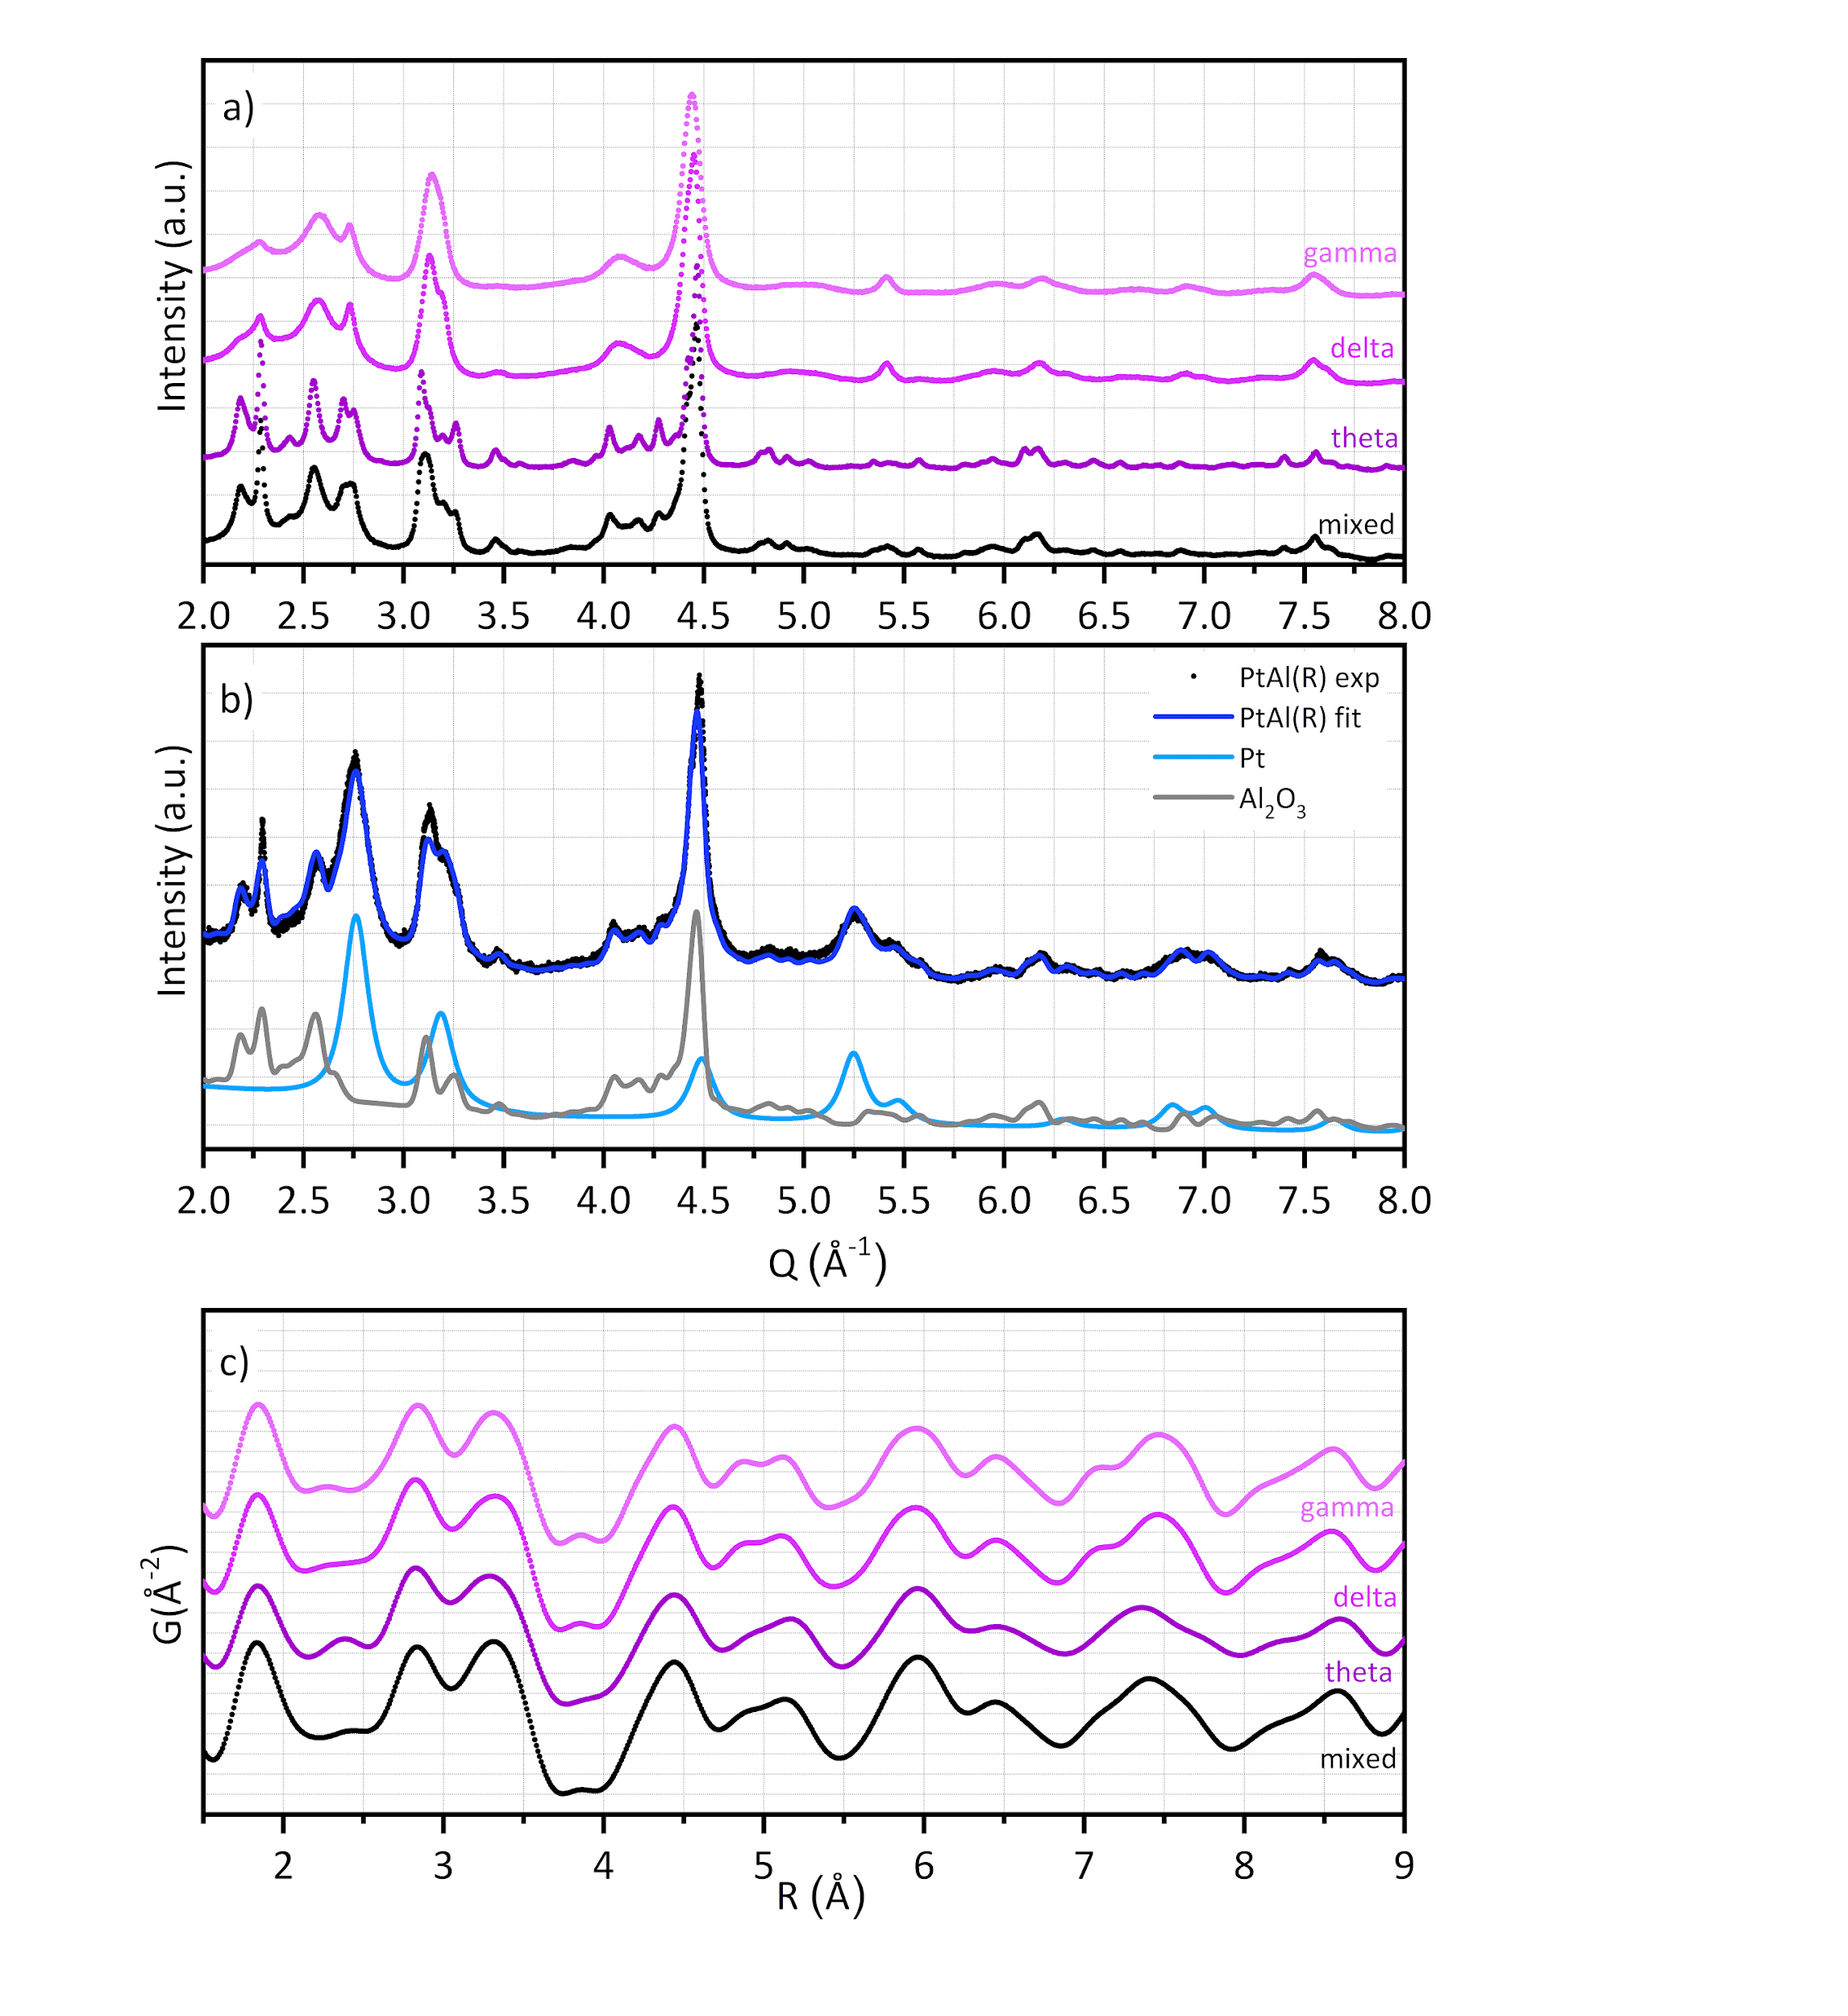


**Figure S2.** (a) Experimental high-resolution XRD patterns of the alumina support (mixed) compared to those of three Al2O3 samples containing predominantly θ, δ, or γ phases, respectively. (b) Experimental high-resolution XRD pattern of as-received PtAl(R) (black dots), total fit (blue) and individual contributions of Pt (light blue) and Al2O3 (grey) phases. The Al2O3 contribution was modeled using the intergrowth structure proposed by Kovarik et al.5 (P212121 symmetry). Data are expressed in Q (=4πsin(θ)/λ; λ=0.1265 Å; θ is half of the Bragg angle). (c) PDF patterns of the alumina support (mixed) compared to those of three Al2O3 samples containing predominantly θ, δ, or γ phases, respectively.

**3. Construction and optimization of the Pt34/γ-Al2O3 and Pt55/γ-Al2O3 models**

While the Pt13Hy/γ-Al2O3, Pt34H54/γ-Al2O3 and Pt55H44/γ-Al2O3 models were described previously,6, 7 the Pt34/γ-Al2O3 and Pt55/γ-Al2O3 models are reported herein for the first time. Pt34/γ-Al2O3 was constructed starting from a truncated cuboctahedron deposited on alumina (100) surface (support model from refs.8, 9). Pt55/γ-Al2O3 was constructed starting from a cuboctahedron deposited on the same alumina surface through the Pt(100) facet (this appeared to generate a more stable cluster than when depositing it through the Pt(111) facet of the cuboctahedron). A four-layer support model was used, the two top-ones being relaxed with the cluster, and the dimensions of the orthorhombic cell were 16.714 x 16.787 x 30 Å3. The VASP code10, 11 was used for the geometry optimizations in the framework of the density functional theory, made with the PBE12 exchange correlation functional and PAW13 pseudopotentials, with a cutoff of 400 eV. A convergence criterion on the energy of the SCF cycles of 10-6 eV and a convergence criterion on forces of 0.02 eV/Å were chosen. The calculations were made at the Γ point, and with a dipolar correction on the z-axis (perpendicular to the slabs).

**4. Determination of the average Pt crystal size from PDF data**

The PDF of the as-received PtAl(R) and of the PtAl(R) and PtAl samples after reduction in either gas phase or liquid phase was fitted using an *fcc* Pt phase using Topas Academic v7 (see Manuscript). The PDF was calculated after subtraction of the pattern of the undeposited mixed-phase Al2O3 acquired at the same temperature and under the same chemical conditions. Fits on the PDF of a NIST Cr2O3 standard were used to refine the parameters related to instrumental resolution and Q-termination, which were then fixed in the fit to the samples’ PDF.

For the Pt phases we refined lattice parameter, scale factor, a Debye-Waller factor accounting for correlated nearest-neighbour displacements, and a factor accounting for dampening of the PDF intensity based on the size of a spherical nanoparticle:

where r is the radius of the nanoparticle, R is the real space axis in G(R), and Y is the multiplicative scale factor applied to the PDF.

**Table S1.** Lattice parameters and average crystal size for the Pt NPs before reduction (pristine), and after isothermal reduction at 120 °C, either in gas or in liquid phase, as determined by analyzing the experimental PDF patterns.

|  | PtAl(R) | | PtAl | |
| --- | --- | --- | --- | --- |
|  | Lattice pars.  (Å) | Cryst. size  (nm) | Lattice pars.  (Å) | Cryst. size  (nm) |
| As such | 3.9149(2) | 3.3(1)(a) | - | - |
| H2-red (gas) | 3.9147(2) | 3.7(1) | 3.9146(2) | 2.3(1) |
| H2-red (liquid) | 3.9152(3) | 3.4(1) | 3.9152(7) | 2.3(1) |

(a) 2.8 nm from analysis of XRD patterns


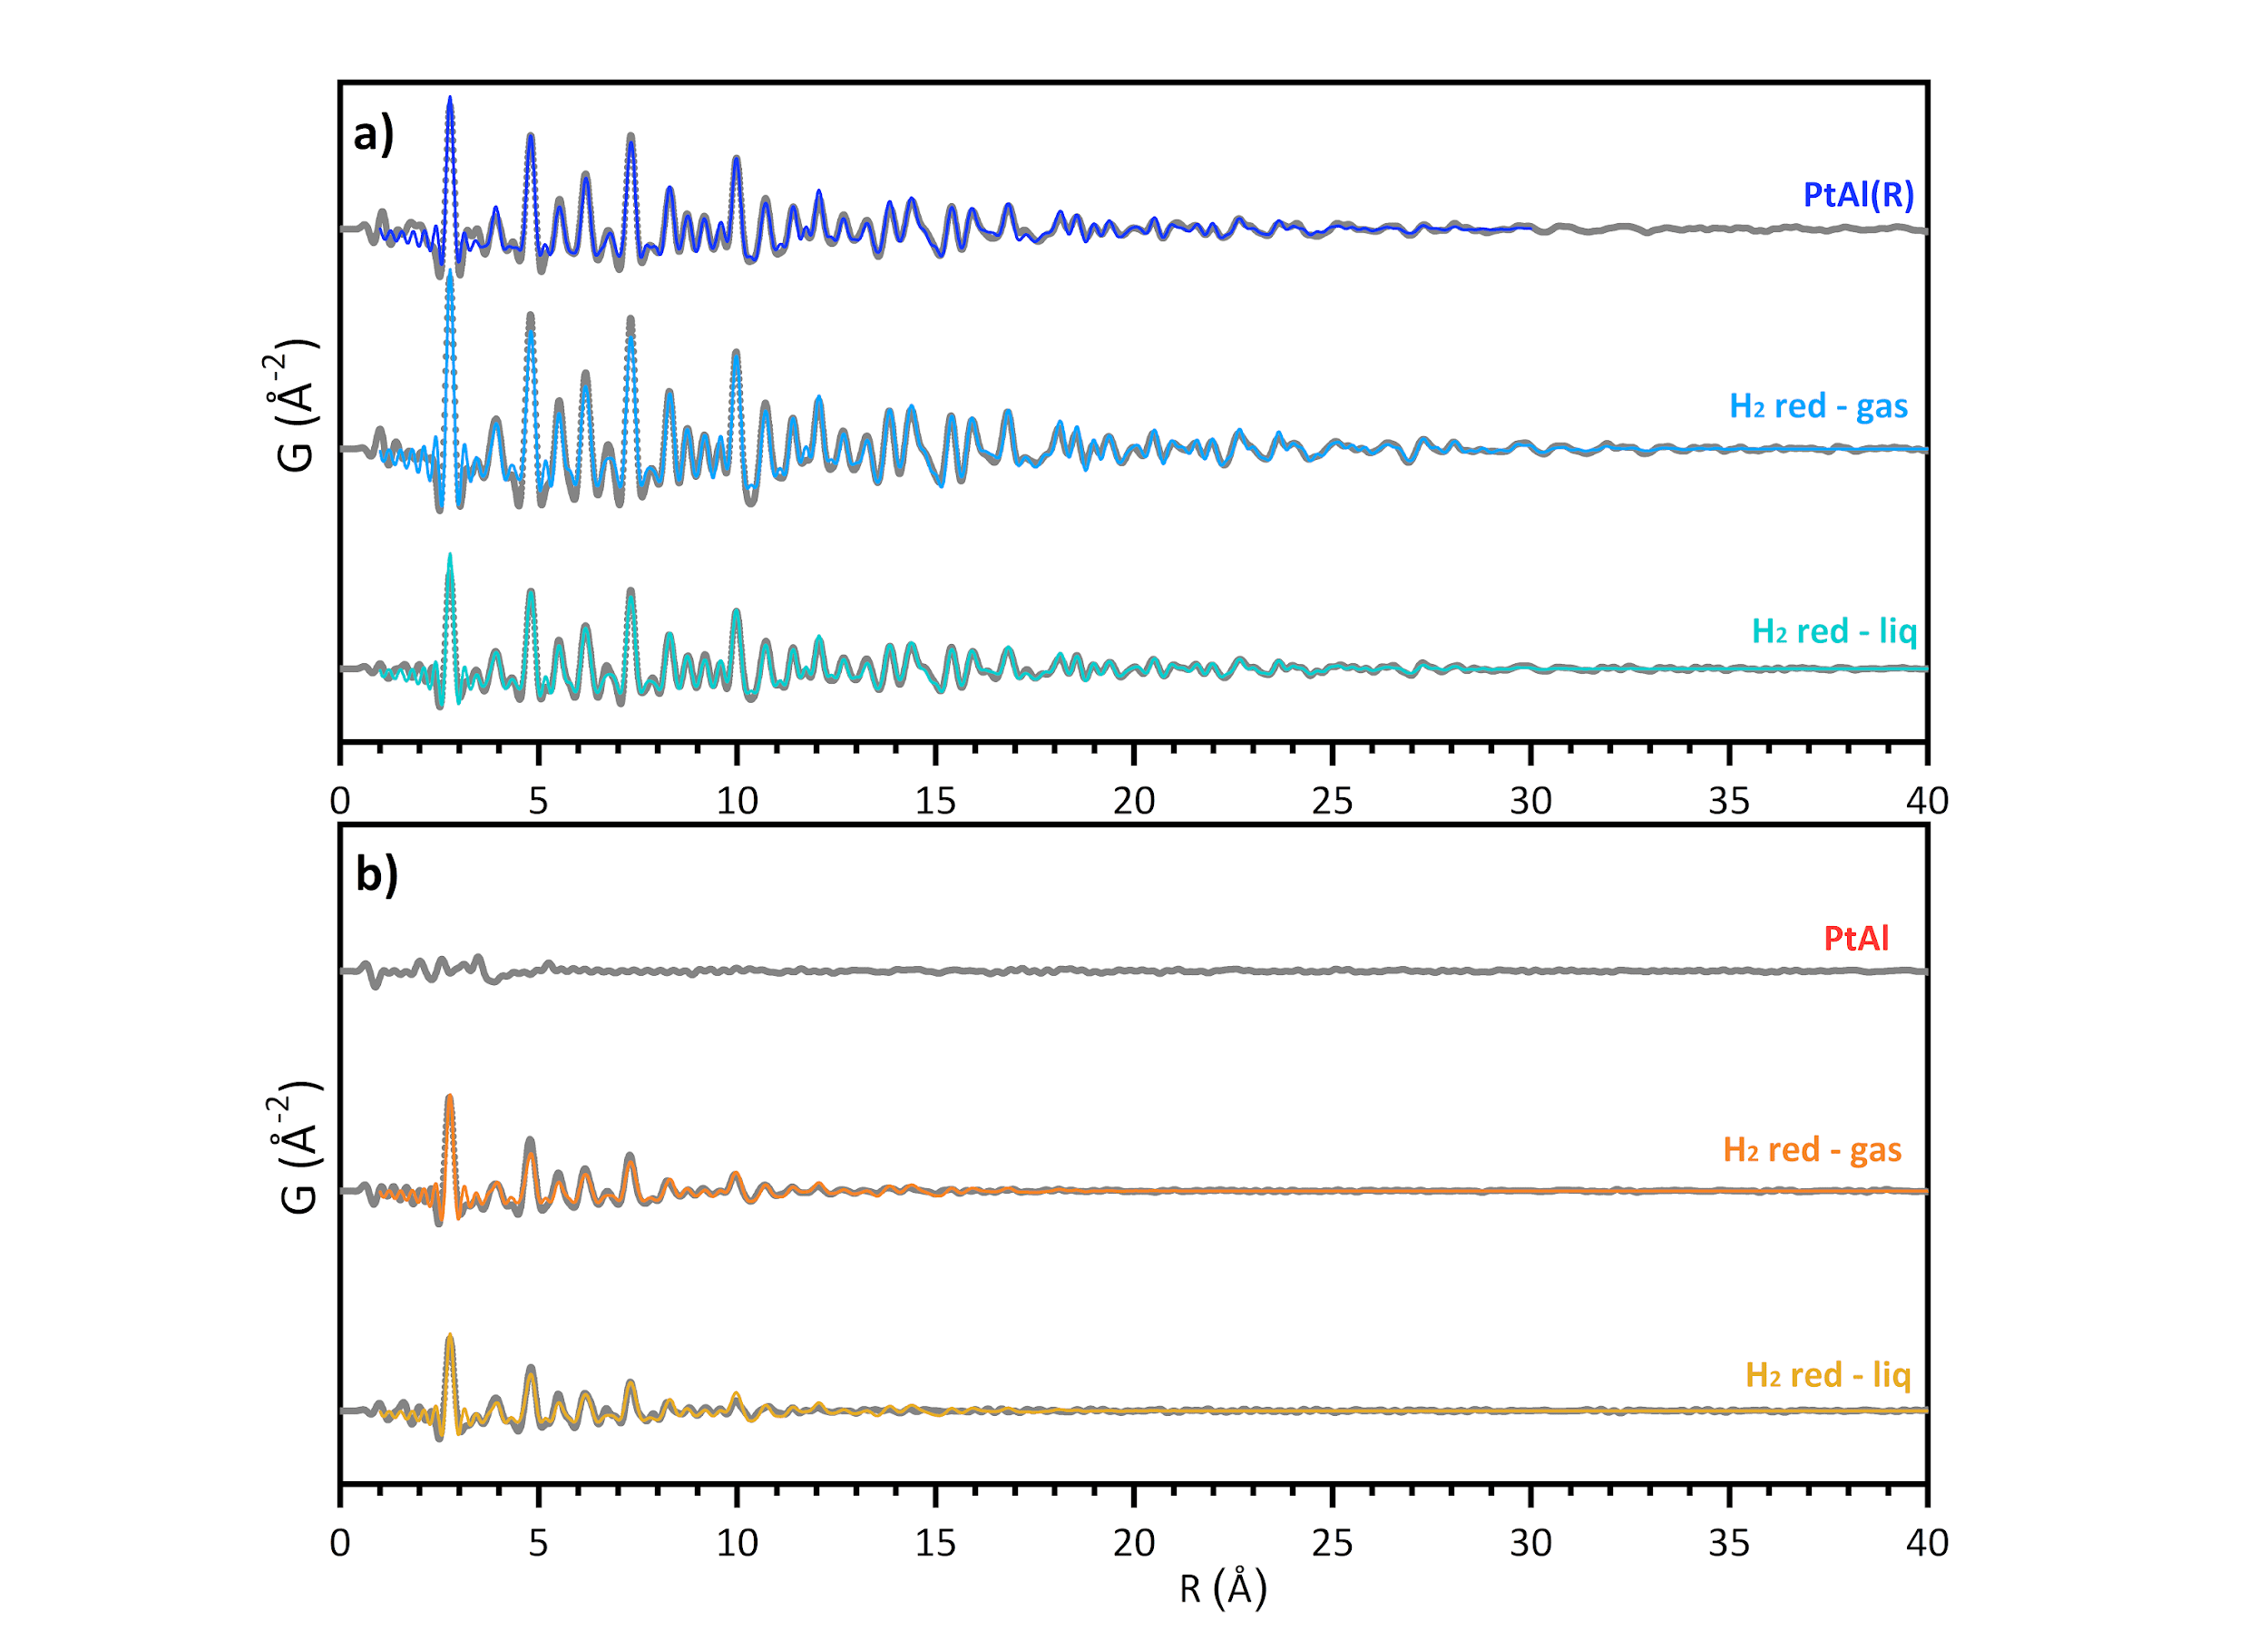


**Figure S3.** Experimental full PDF patterns (grey dots) of (a) PtAl(R) and (b) PtAl at ambient conditions, after reduction in H2/Ar at 150°C, and after reduction in H2/cyclohexane at 70°C, and their fit (lines) performed using a spherical-particle model for Pt NPs. Curves are offset for the sake of clarity. The fit of the pattern of PtAl was not performed because the signal is structureless.

**5. Monitoring the reduction process: additional plots**


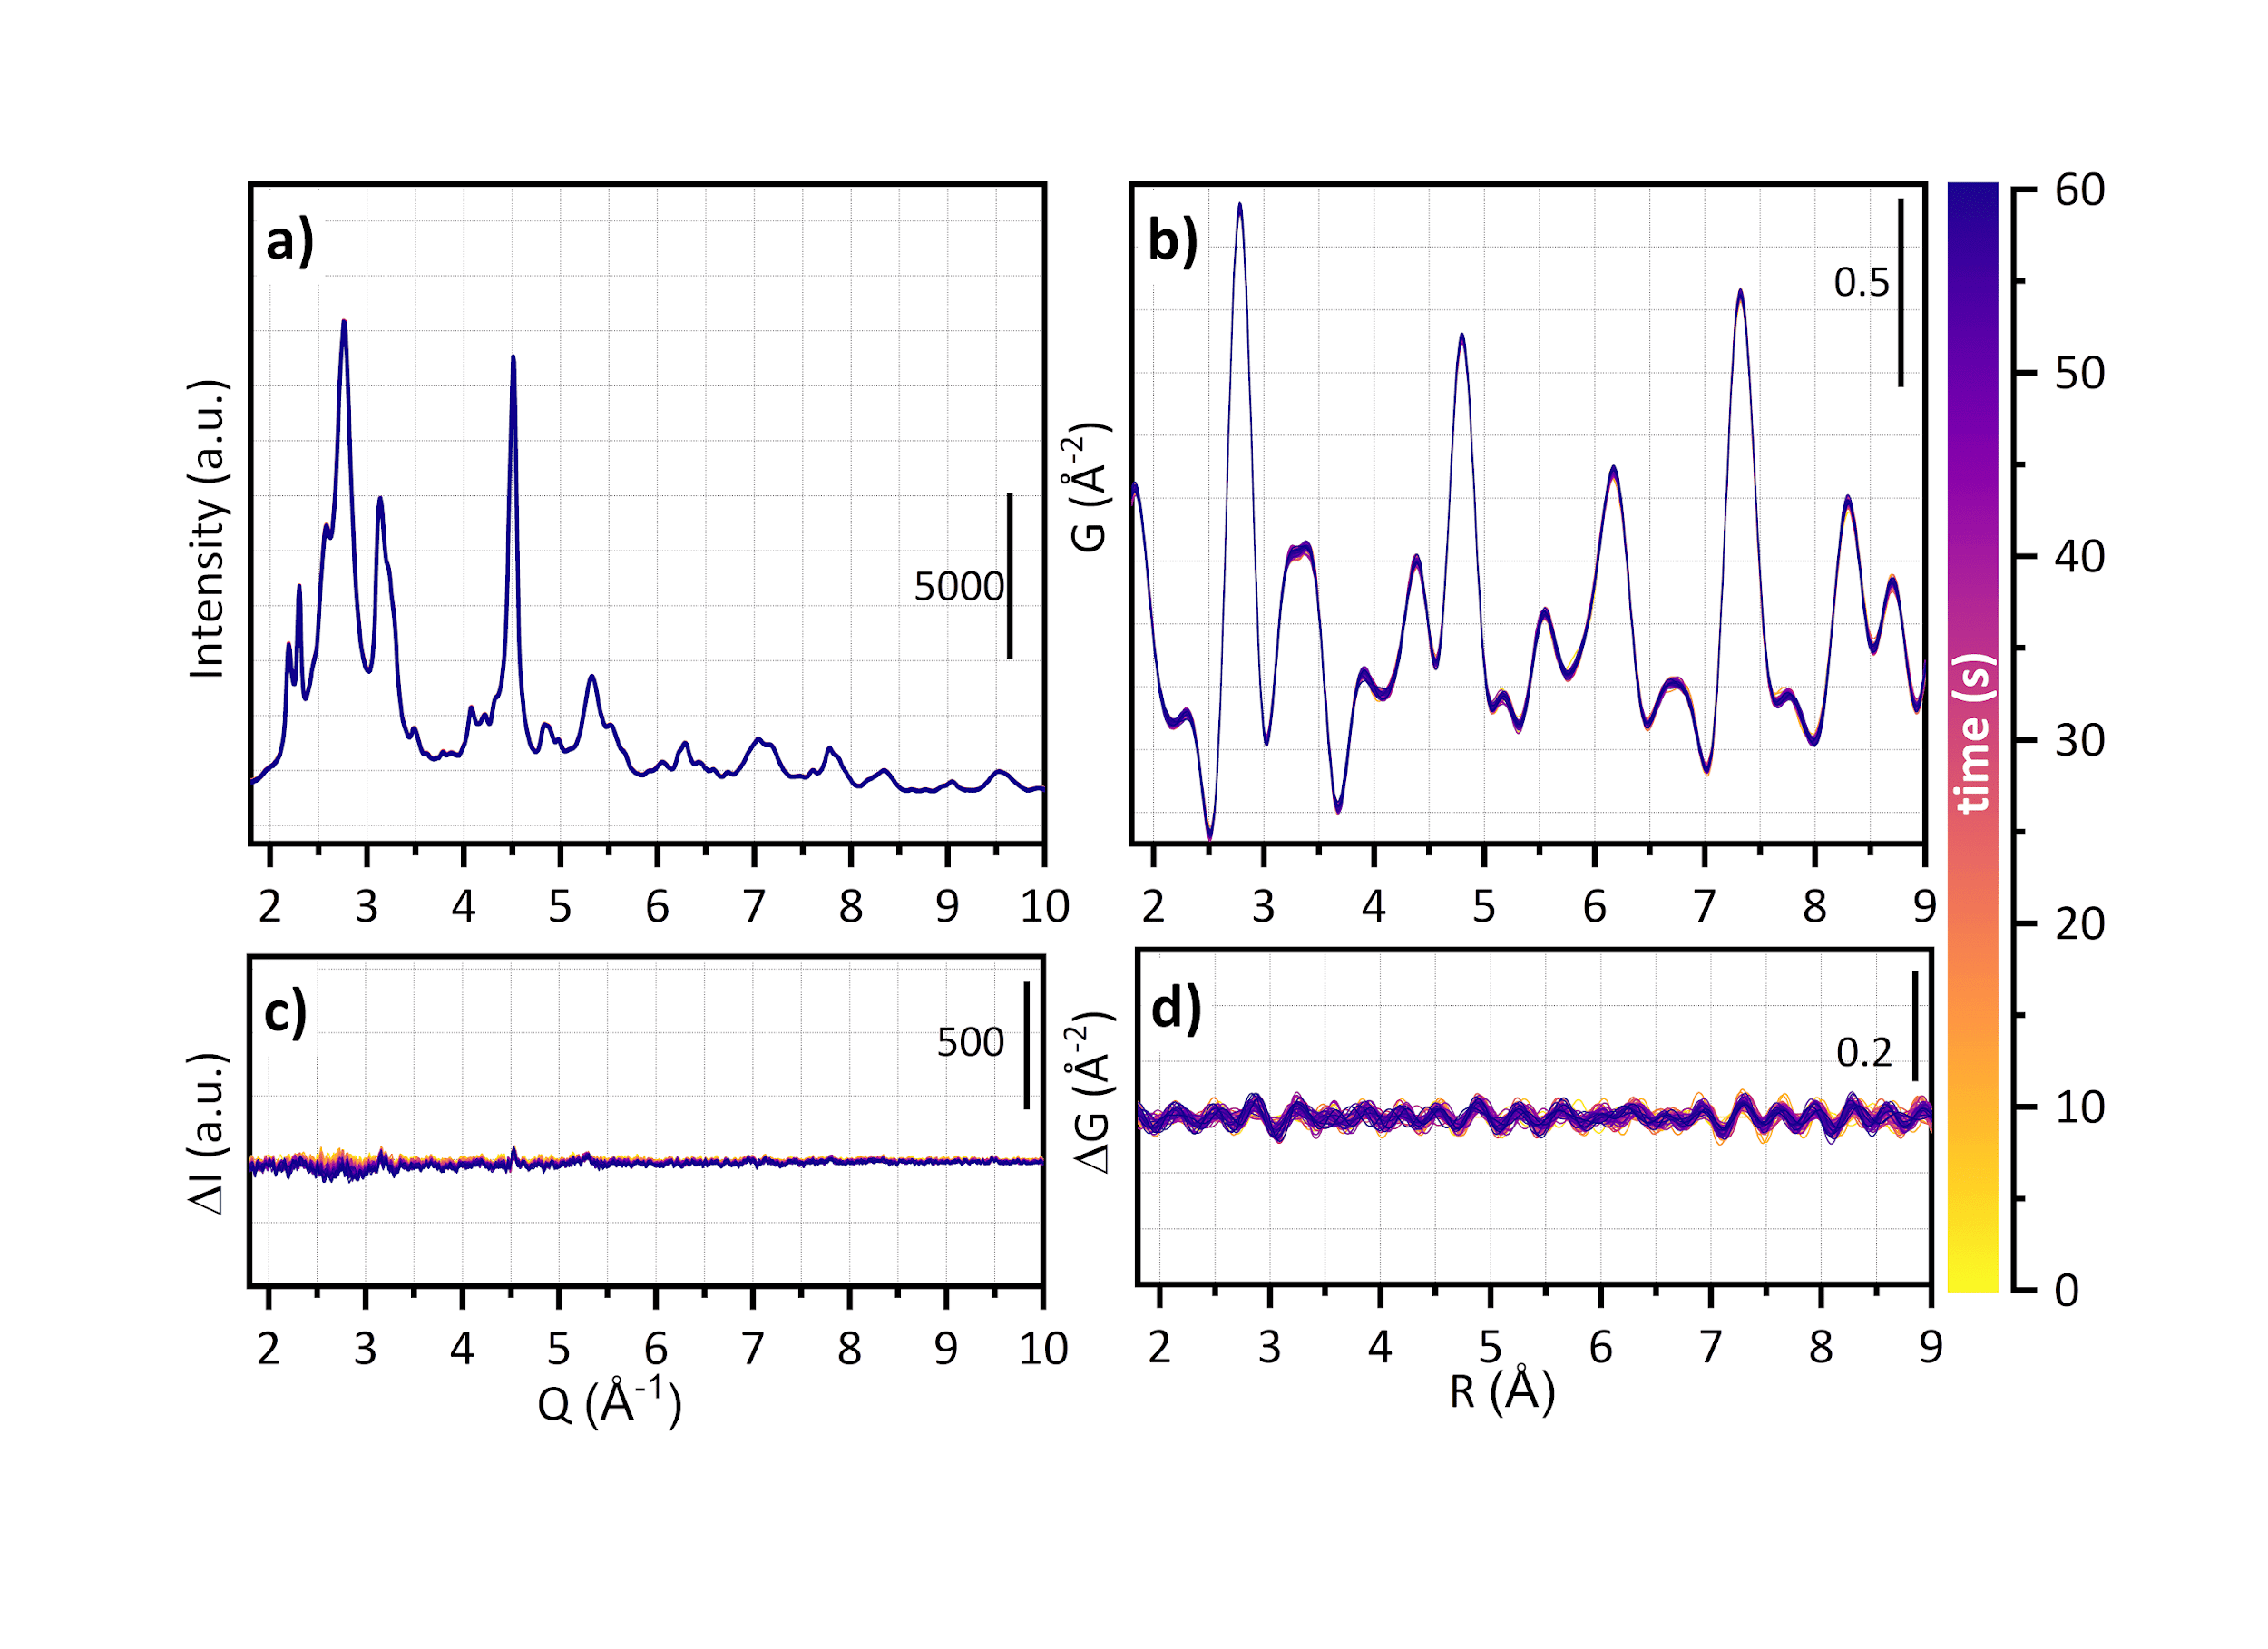


**Figure S4.** Time-evolution of the (a) XRD and (b) PDF patterns of PtAl(R) during the isothermal reduction in H2/Ar at 150°C. Time evolution (yellow to blue) of differential (c) XRD and (d) PDF patterns obtained upon subtracting the last pattern before H2 was admitted. 1 pattern/s collected during the first 60 s of reaction.


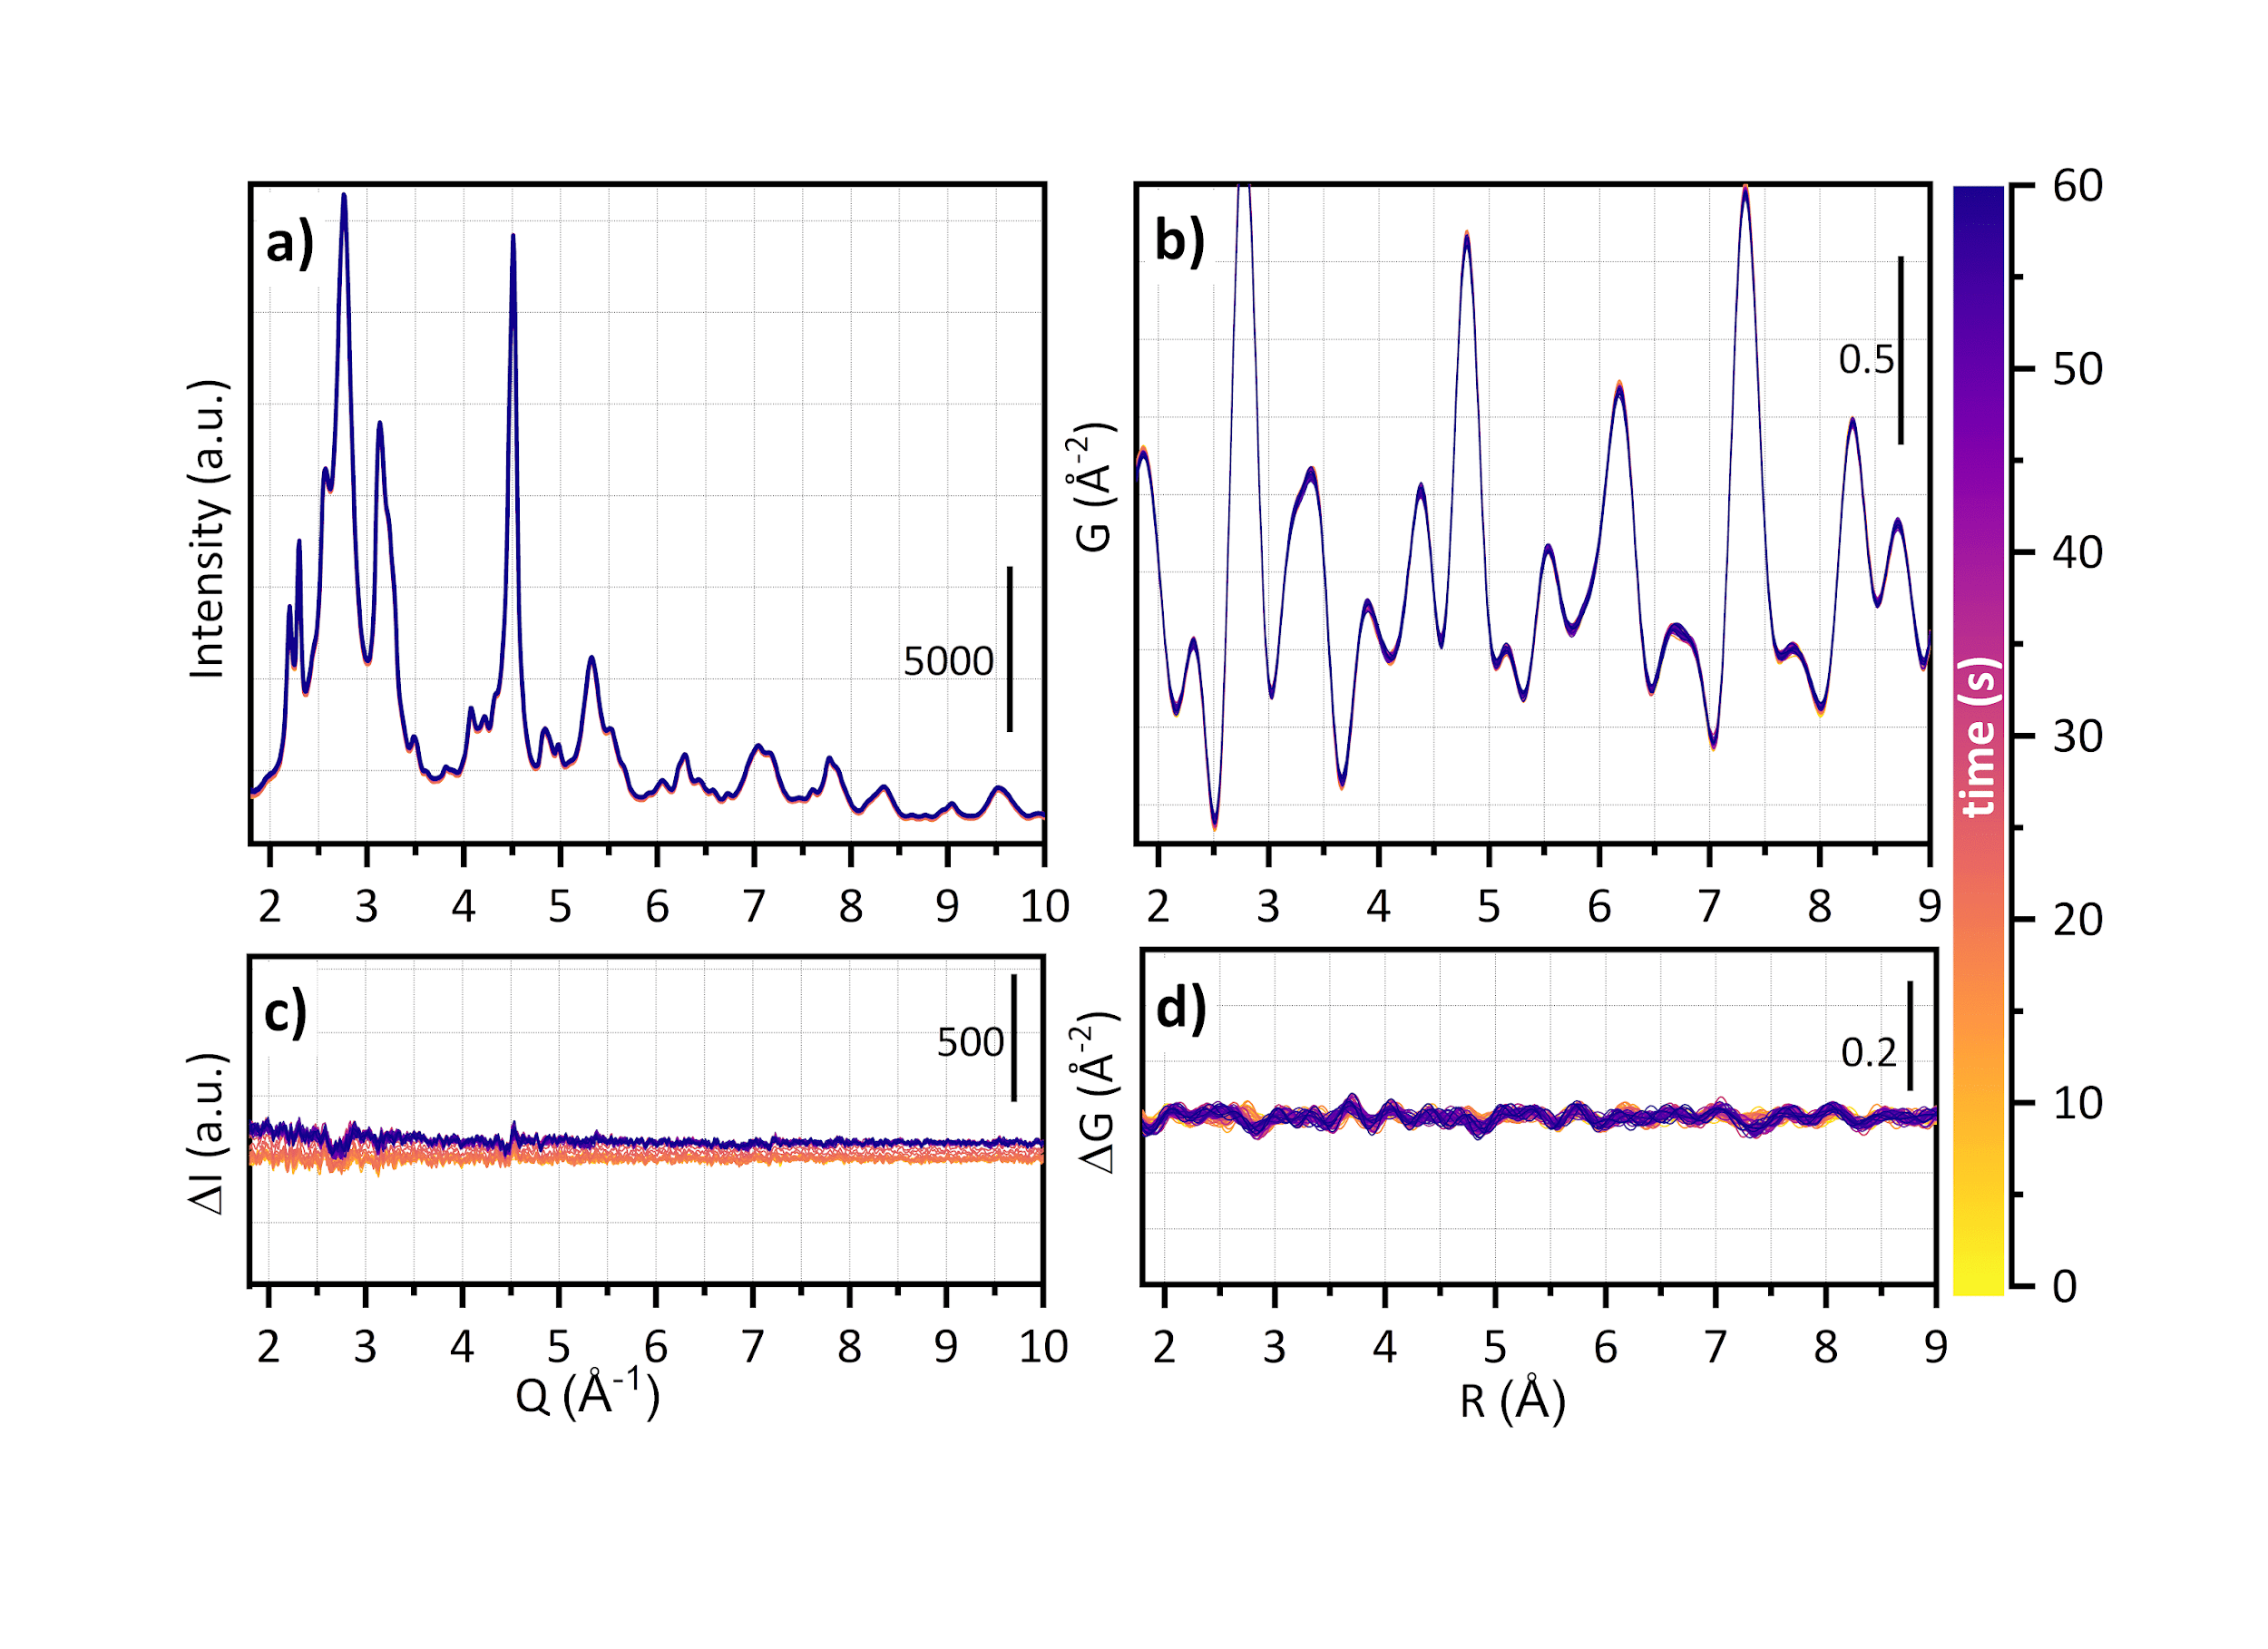


**Figure S5.** Time-evolution of the (a) XRD and (b) PDF patterns of PtAl(R) during the isothermal reduction in H2/cyclohexane at 70°C. Time evolution (yellow to blue) of difference (c) XRD and (d) PDF patterns obtained upon subtracting the last pattern before H2 was admitted. 1 pattern/s collected during the first 60 s of reaction.


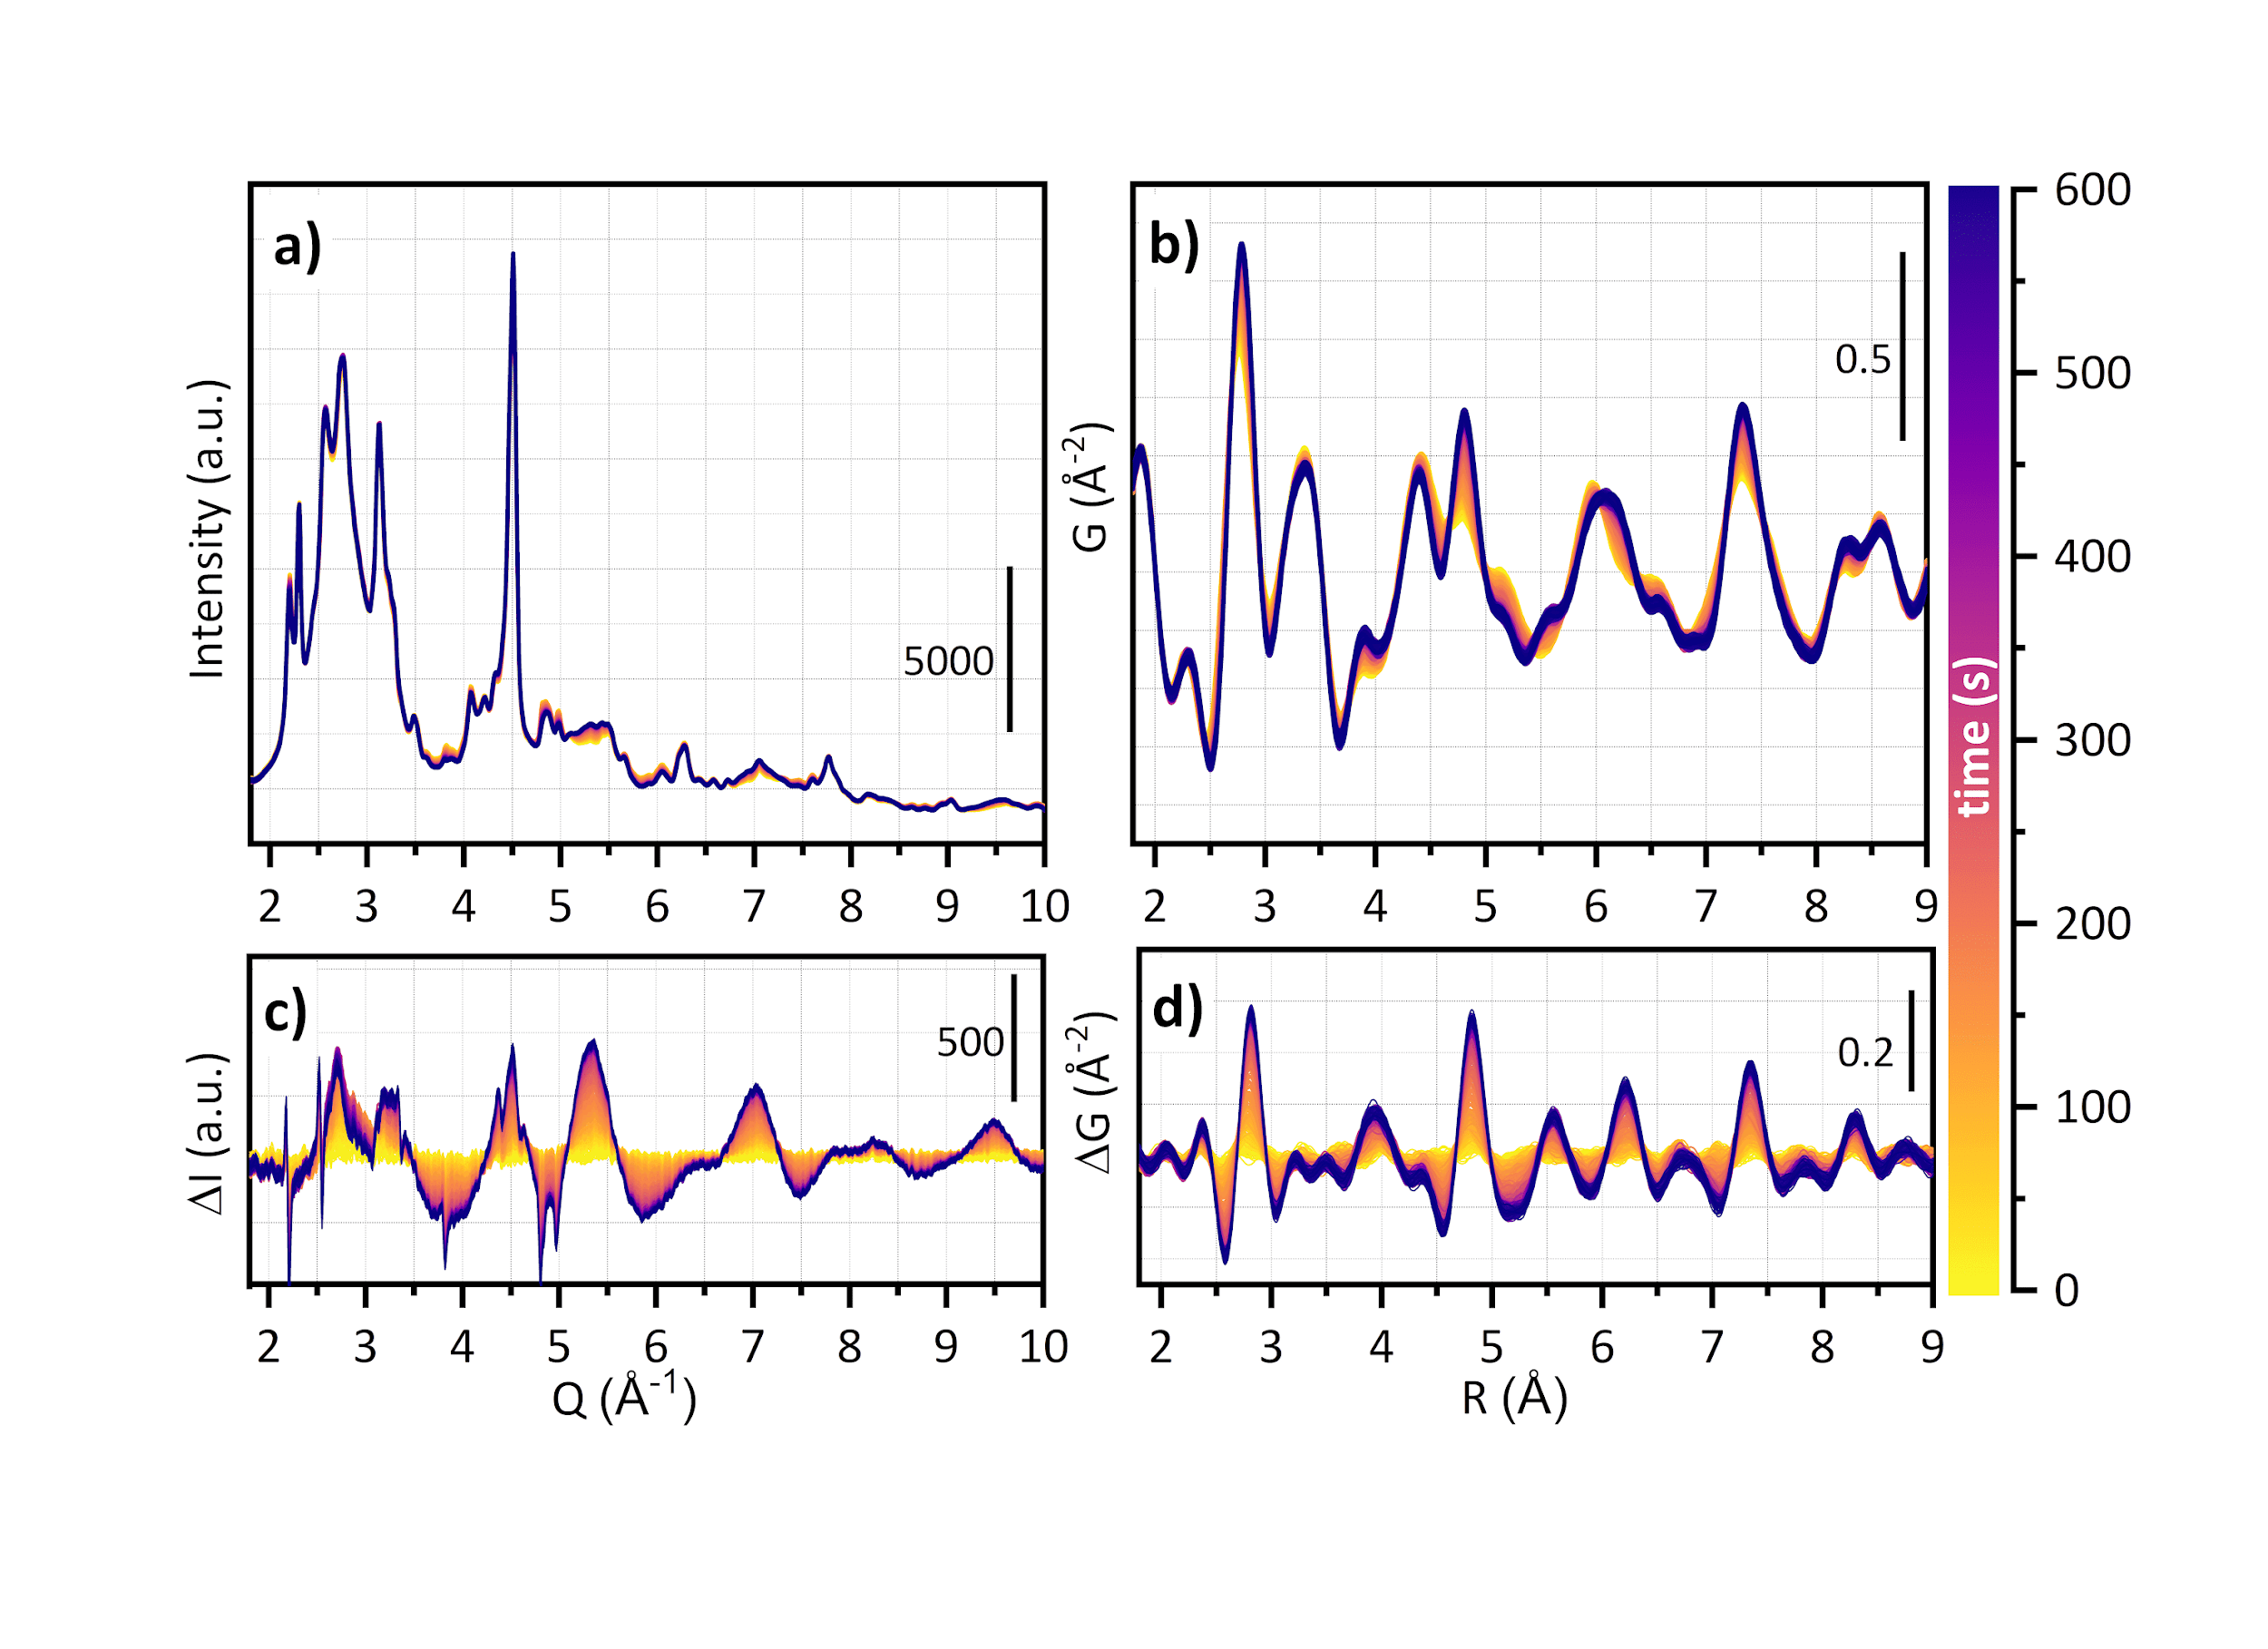


**Figure S6.** Time-evolution of the (a) XRD and (b) PDF patterns of PtAl during the isothermal reduction in H2/cyclohexane at 70°C. Time evolution (yellow to blue) of difference (c) XRD and (d) PDF patterns obtained upon subtracting the last pattern before H2 was admitted. 1 pattern/s collected during the first 10 min of reaction.

**6. Comparison of the PDF patterns at the end of the reduction process in gas and liquid phase for both catalysts**


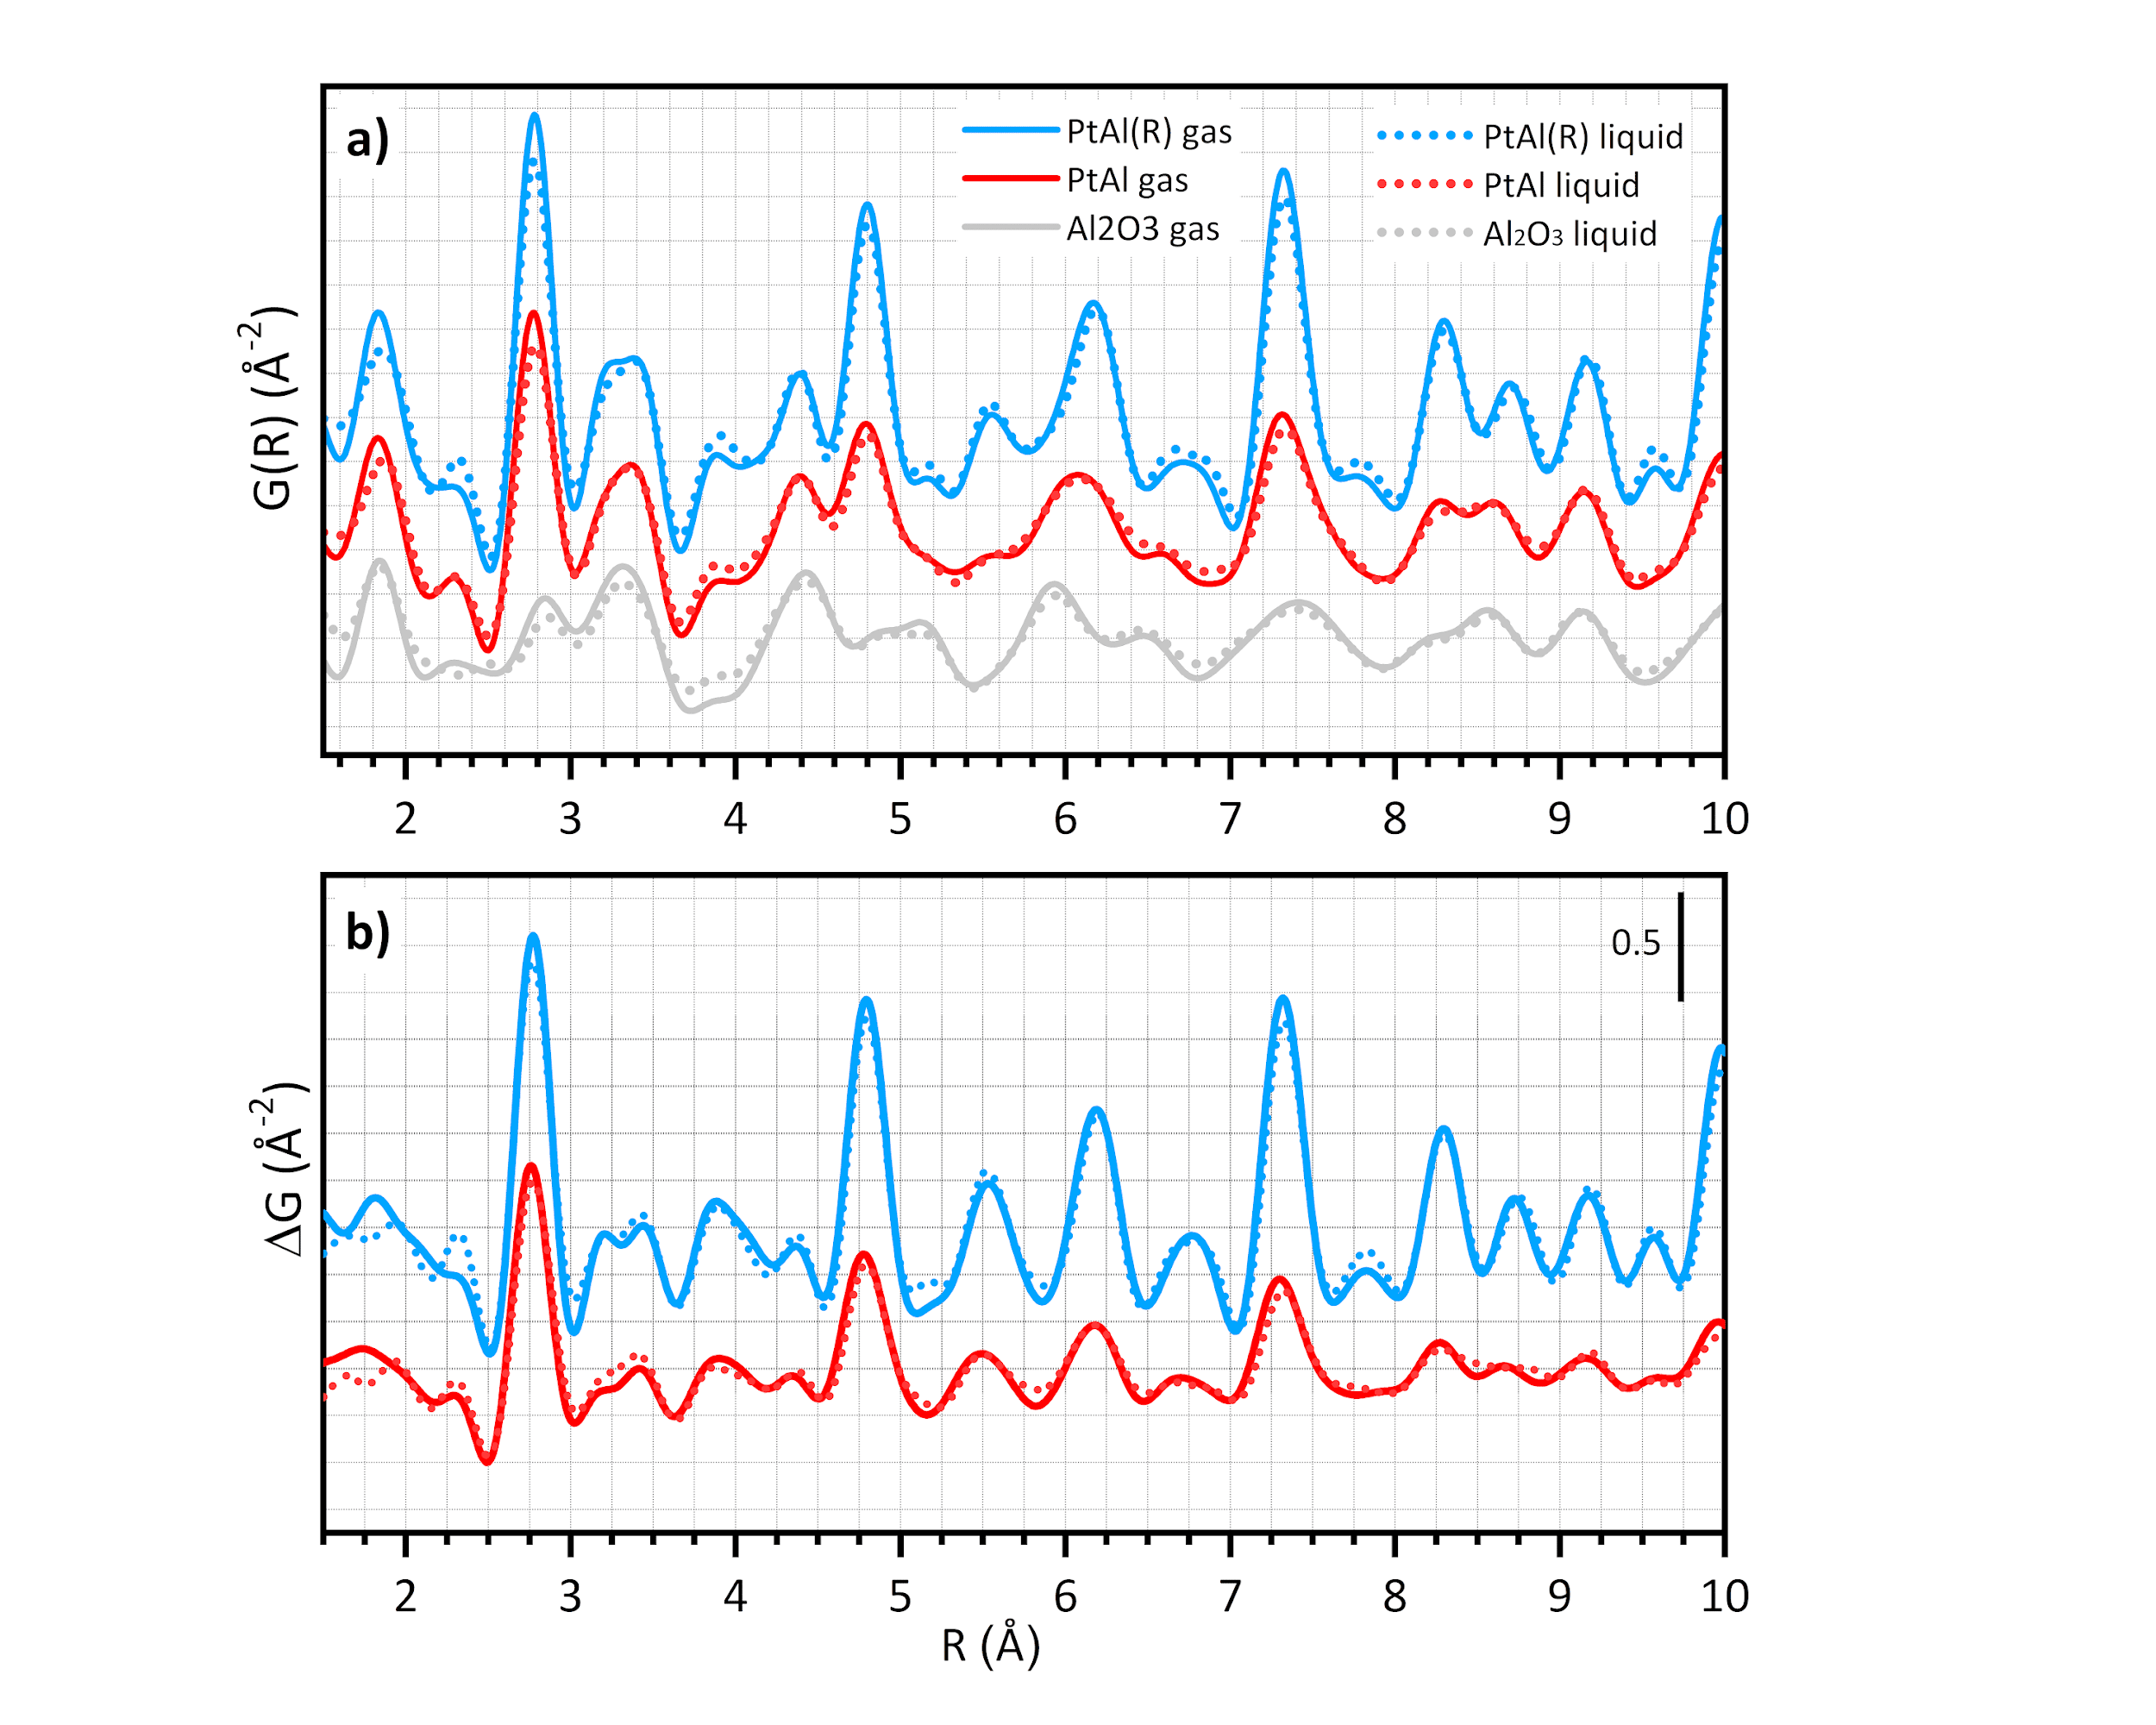


**Figure S7.** PDF patterns (a) of PtAl(R) (blue) and PtAl (red) catalysts at the end of the isothermal reduction, in H2/Ar flow at 150 °C (gas, full lines) and in H2-saturated cyclohexane at 70°C (liquid, dotted lines), and Al2O3 background subtracted counterparts (b).

**7. Simulated PDF patterns**


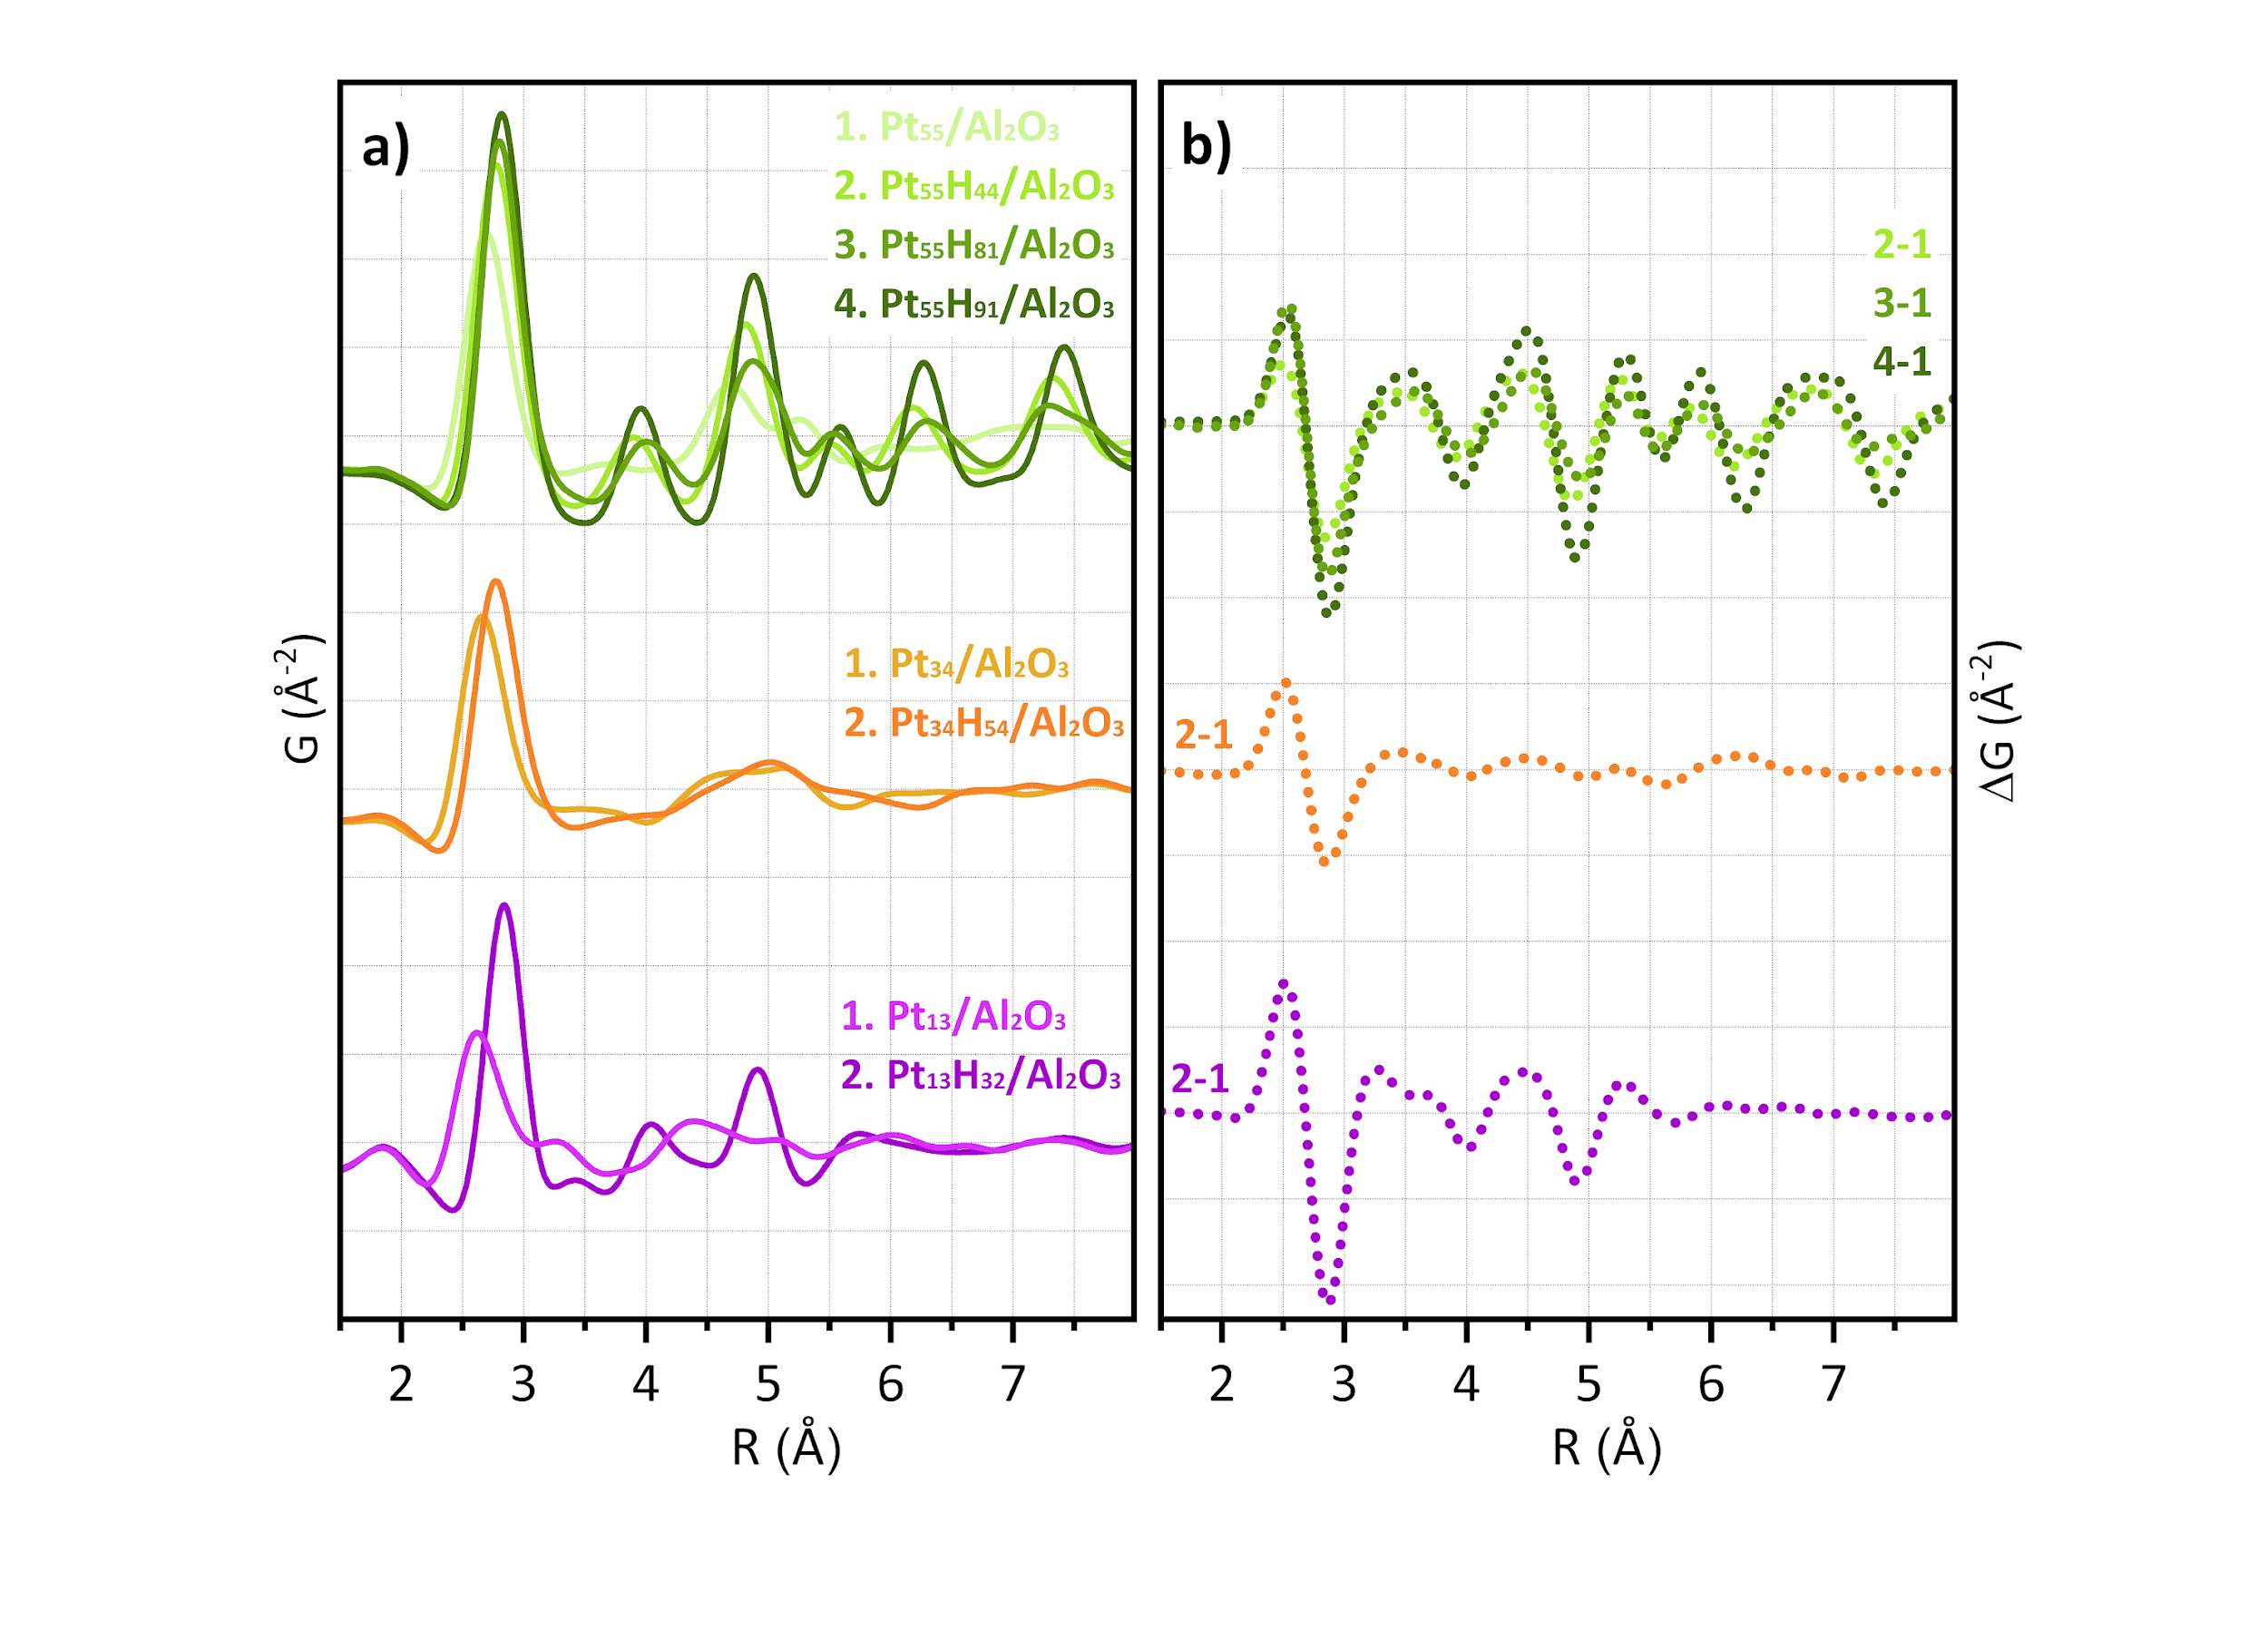


**Figure S8.** (a) Simulated PDF patterns for the Pt55/Al2O3*,* Pt34/Al2O3 and Pt13/Al2O3 models and their hydrogenated counterparts and (b) their difference (offset for clarity).


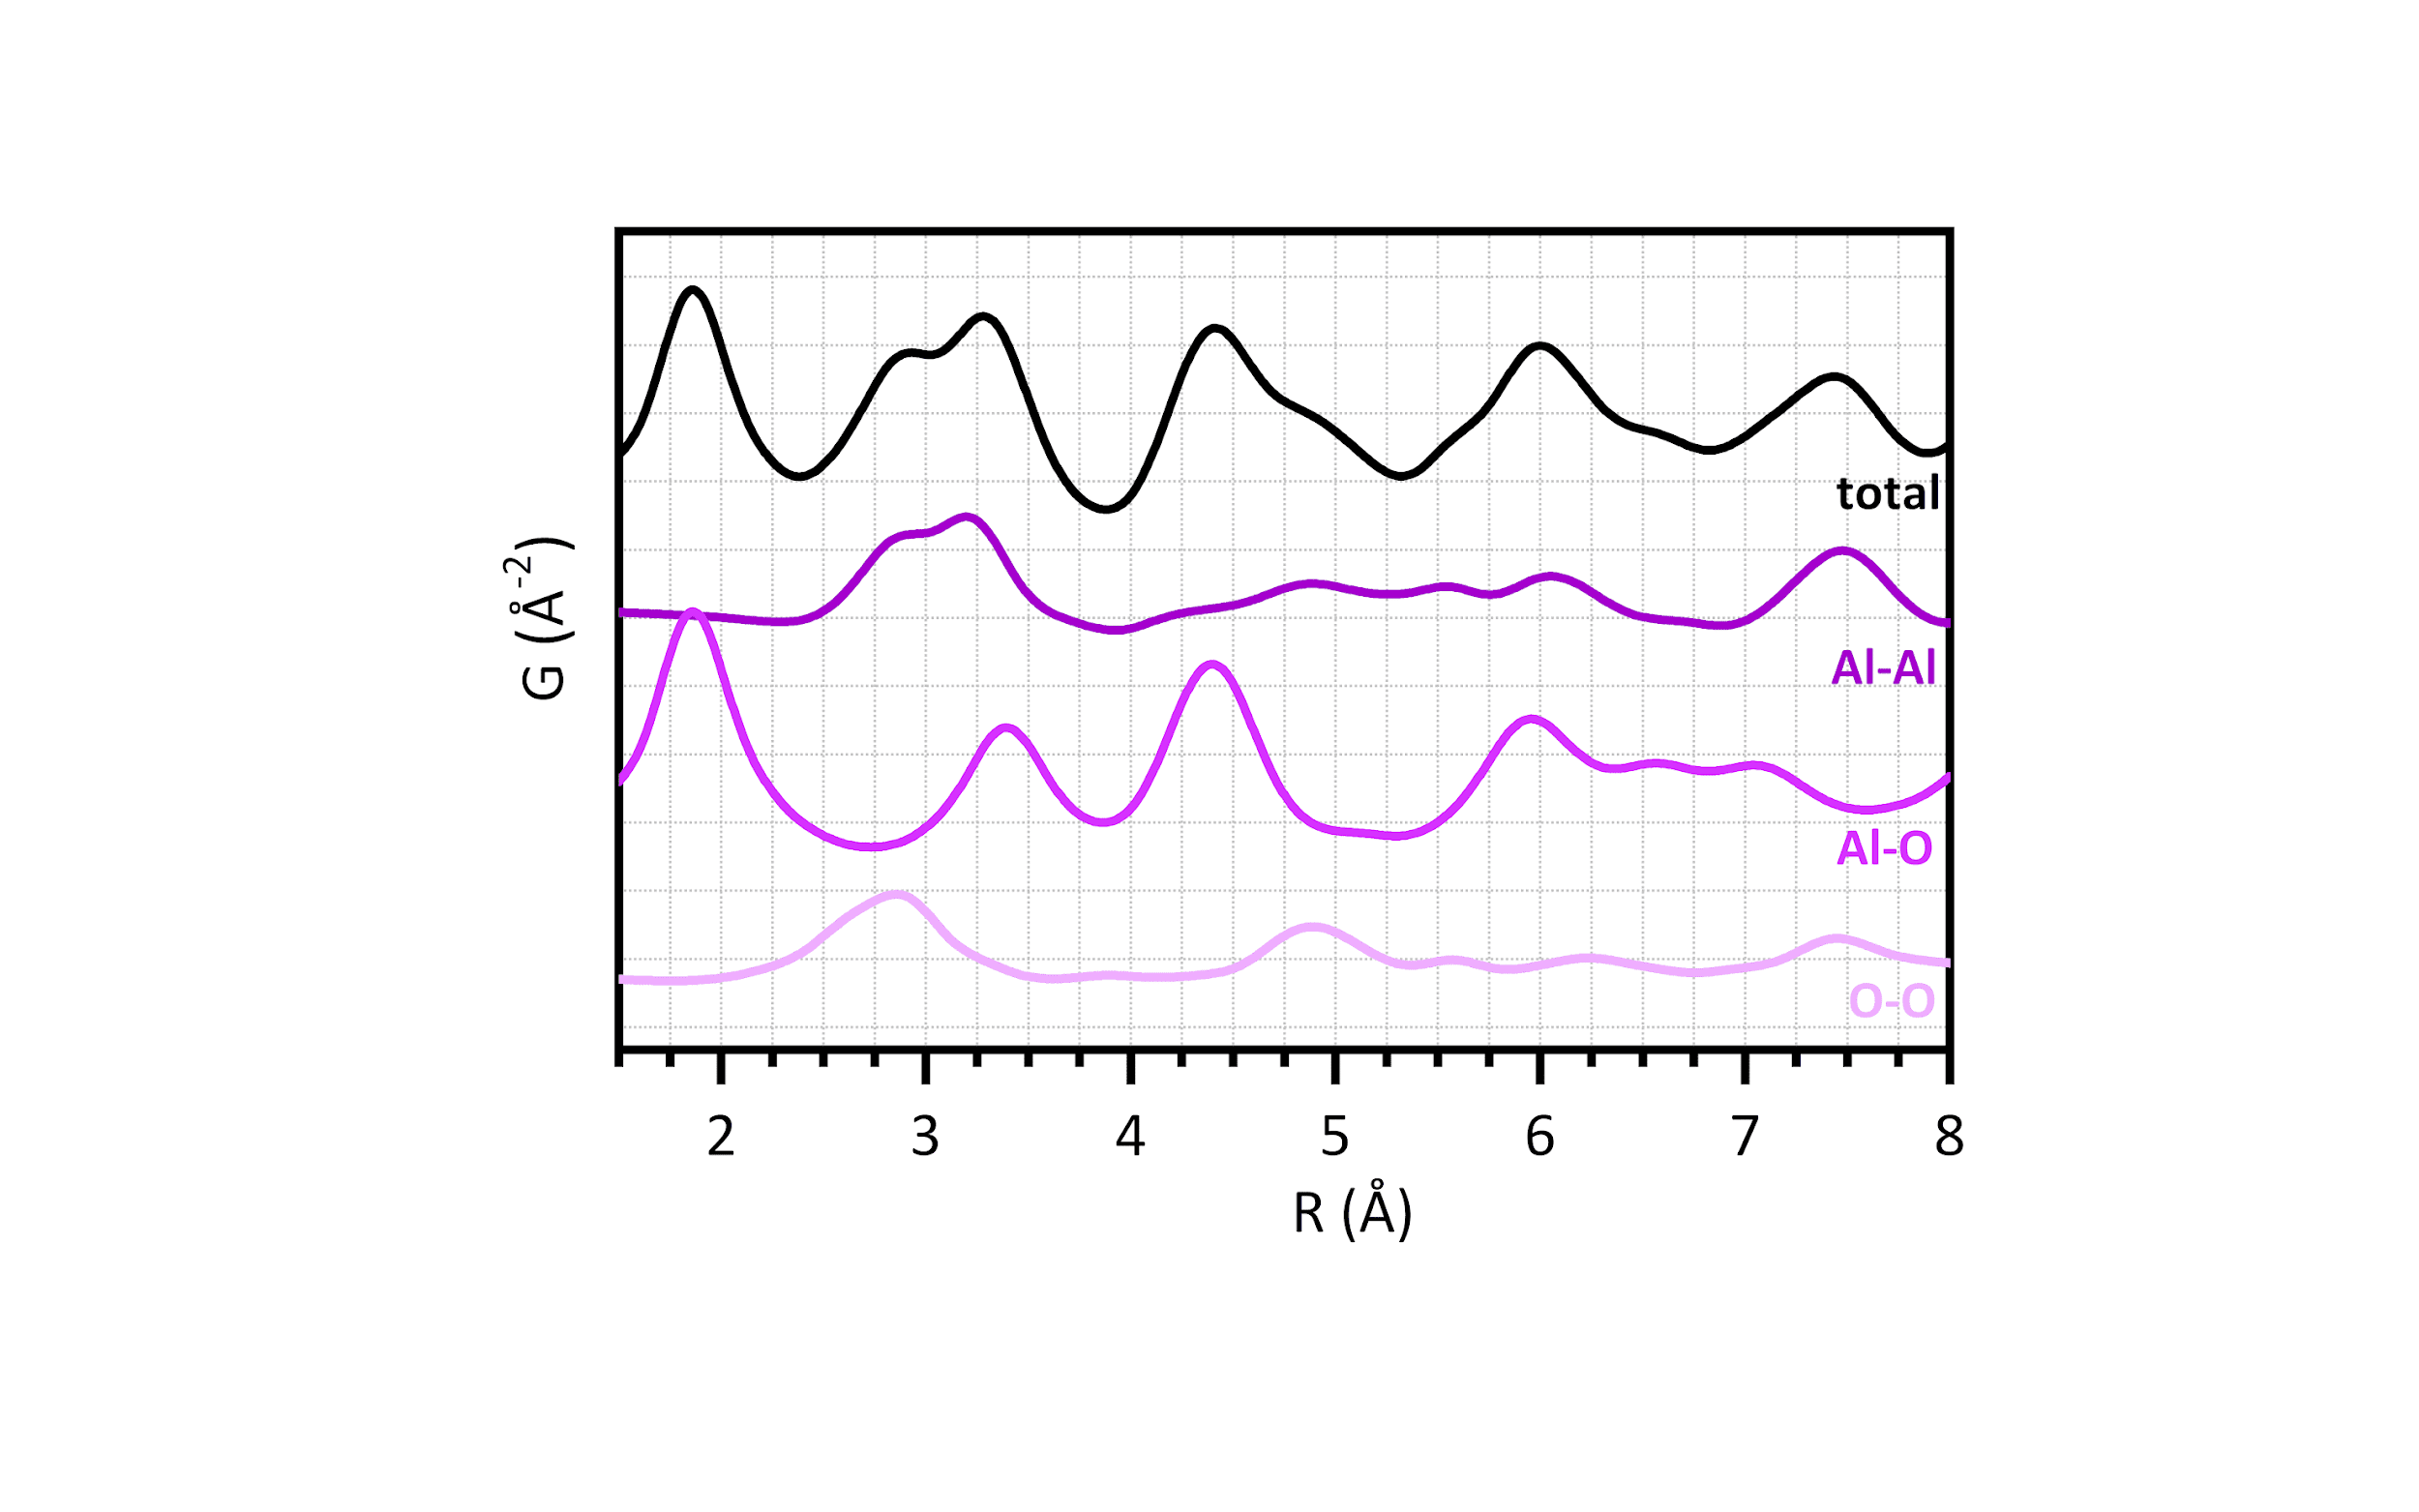


**Figure S9.** Simulated PDF pattern for the Al2O3 slab adopted in the models (black) and single Al-Al, Al-O and O-O contributions. reported in part (a) and (c) their difference (offset for clarity).


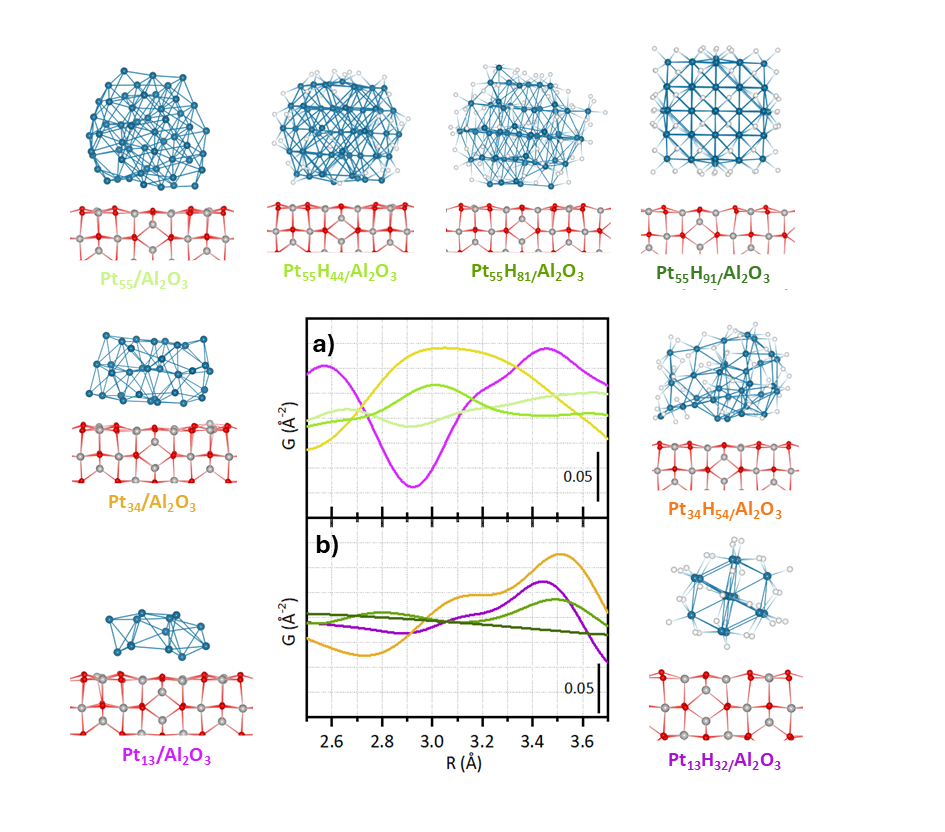


**Figure S10.** Pt-support contributions to the simulated PDF patterns for (a) the Pt55/Al2O3*,* Pt34/Al2O3 and Pt13/Al2O3 models and (b) their hydrogenated counterparts (blue: Pt, white: H, red: O, grey: Al).

**References**

1. Fitch A.*, et al.* ID22 - the high-resolution powder-diffraction beamline at ESRF. *J. Synchrotron Radiat.* **30**, 1003-1012 (2023).

2. Coelho A. TOPAS and TOPAS-Academic: an optimization program integrating computer algebra and crystallographic objects written in C++. *J. Appl. Crystallogr.* **51**, 210-218 (2018).

3. Kovarik L., Bowden M., Andersen A., Jaegers N. R., Washton N., Szanyi J. Quantification of High-Temperature Transition Al2O3 and Their Phase Transformations. *Angew. Chem. Int. Ed.* **59**, 21719-21727 (2020).

4. Balzar D., Ledbetter H. Voigt-function modeling in Fourier analysis of size- and strain-broadened X-ray diffraction peaks. *J. Appl. Crystallogr.* **26**, 97-103 (1993).

5. Kovarik L., Bowden M., Andersen A., Jaegers N. R., Washton N., Szanyi J. Quantification of High-Temperature Transition Al2O3 and Their Phase Transformations. *Quantification of High-Temperature Transition Al2O3 and Their Phase Transformations* **59**, 21719-21727 (2020).

6. Mager-Maury C., Bonnard G., Chizallet C., Sautet P., Raybaud P. H2-Induced Reconstruction of Supported Pt Clusters: Metal–Support Interaction versus Surface Hydride. *ChemCatChem* **3**, 200-207 (2011).

7. Vottero E.*, et al.* Evidence for H2-Induced Ductility in a Pt/Al2O3 Catalyst. *ACS Catal.* **12**, 5979-5989 (2022).

8. Digne M., Sautet P., Raybaud P., Euzen P., Toulhoat H. Hydroxyl Groups on γ-Alumina Surfaces: A DFT Study. *J. Catal.* **211**, 1-5 (2002).

9. Digne M., Sautet P., Raybaud P., Euzen P., Toulhoat H. Use of DFT to achieve a rational understanding of acid–basic properties of γ-alumina surfaces. *J. Catal.* **226**, 54-68 (2004).

10. Kresse G., Furthmüller J. Efficiency of ab-initio total energy calculations for metals and semiconductors using a plane-wave basis set. *Comput. Mater. Sci.* **6**, 15-50 (1996).

11. Kresse G., Hafner J. Ab initio molecular-dynamics simulation of the liquid-metal--amorphous-semiconductor transition in germanium. *Ab initio molecular-dynamics simulation of the liquid-metal--amorphous-semiconductor transition in germanium* **49**, 14251-14269 (1994).

12. Perdew J. P., Burke K., Ernzerhof M. Generalized Gradient Approximation Made Simple. *Phys. Rev. Lett.* **77**, 3865-3868 (1996).

13. Kresse G., Joubert D. From ultrasoft pseudopotentials to the projector augmented-wave method. *Phys. Rev. B* **59**, 1758-1775 (1999).
